# Supplementary material for: Potential of Cold Plasma to Control Callosobruchus chinensis (Coleoptera: Bruchidae) in Chickpea Cultivars during Four Year Storage
Source: Research Square preprint supplement (doi:10.21203/rs.3.rs-258940/v1), 2021-03-16

Supplementary Figure S2. Quarterly Chickpea grain weight loss (%)

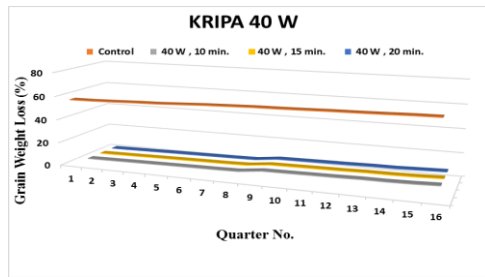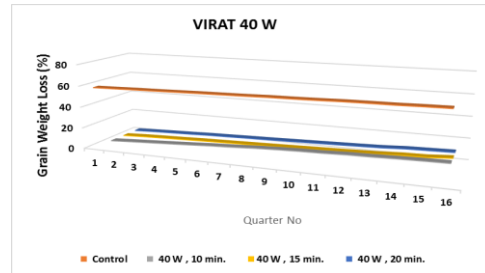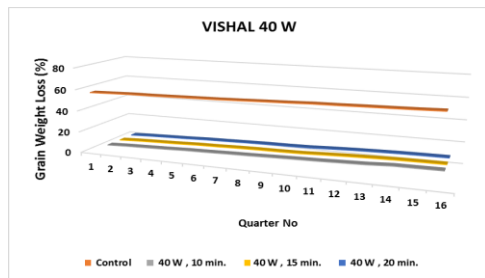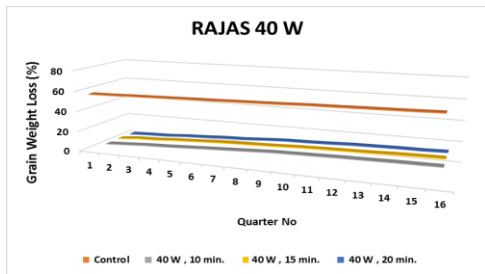

Supplementary Figure S2. Quarterly Chickpea grain weight loss (%)

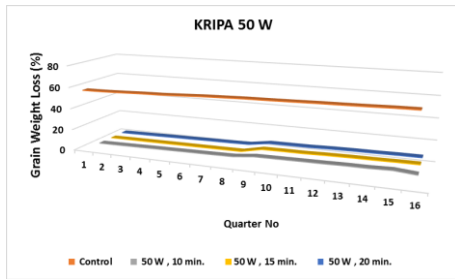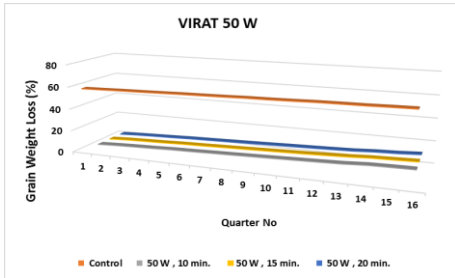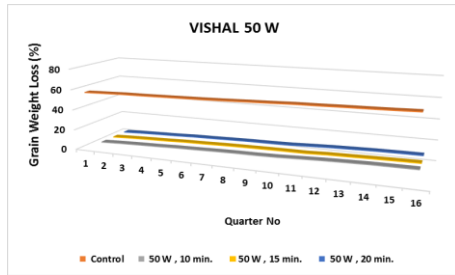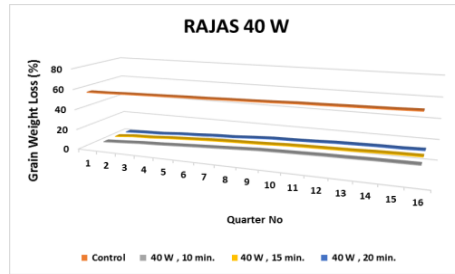

Supplementary Figure S2. Quarterly Chickpea grain weight loss (%)

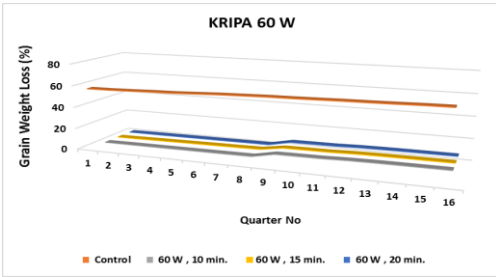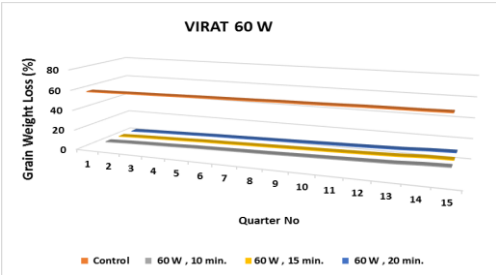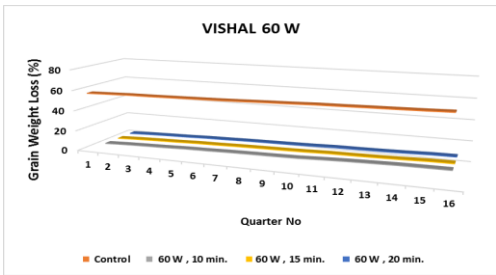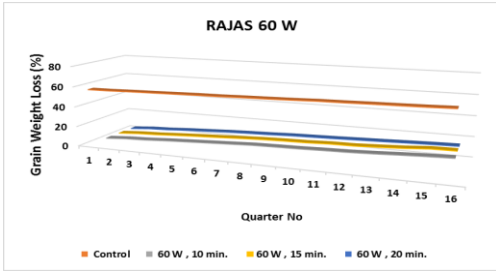

Supplement: Supplementary file [file 4559bf87b6a4e69d2a7ffe73.pdf]
